**Last rendered:** 25 May 2022

**Running head:** EcoEvoApps

## **EcoEvoApps: Interactive Apps for Theoretical Models in Ecology and Evolutionary Biology**

**Authors:** Rosa M. McGuire<sup>1\*</sup>, Kenji T. Hayashi<sup>1\*</sup>, Xinyi Yan<sup>2\*</sup>, Marcel Caritá Vaz<sup>3</sup>, Damla Cinoğlu<sup>2</sup>, Madeline C. Cowen<sup>1</sup>, Alejandra Martínez-Blancas<sup>4</sup>, Lauren L. Sullivan<sup>5</sup>, Sheila Vazquez-Morales<sup>5</sup>, Gaurav S. Kandlikar<sup>5,6,+</sup>

<sup>1</sup> Department of Ecology and Evolutionary Biology, University of California, Los Angeles

<sup>2</sup> Department of Integrative Biology, University of Texas at Austin

<sup>3</sup> Institute for Environmental Science and Sustainability, Wilkes University

<sup>4</sup> Departamento de Ecología y Recursos Naturales, Facultad de Ciencias, Universidad Nacional Autónoma de México

<sup>5</sup> Division of Biological Sciences, University of Missouri, Columbia

<sup>6</sup> Division of Plant Sciences & Technology, University of Missouri, Columbia

\* RMM, KTH, and XY contributed equally to the writing of the manuscript, and their order was decided with a random number generator.

+ Author for correspondence: [gkandlikar@missouri.edu](mailto:gkandlikar@missouri.edu)

**Word count:** 3733 words in the Main Body (including captions and references); 234 words in the Abstract.

**Supplementary materials:** Supplementary PDF file with 5 elements

**Author contributions:** GSK, MCV, and MCC conceived the idea for the project. GSK, MCV, MCC, RMM, KTH, and XY wrote the shiny apps in English. RMM, XY, MCV, DC, AMB, and SVM translated apps into other languages. GSK documented and tested R code. MCV, LLS, and RMM led classroom activities and student surveys. GSK analyzed survey data. KTH, RMM, and XY wrote the first draft of the manuscript with GSK. GSK coordinated and oversaw the project. All authors contributed critically to the drafts and gave final approval for publication.

## 1 Abstract

- 2 1. The integration of theory and data drives progress in science, but a persistent  
3 barrier to such integration in ecology and evolutionary biology (EEB) is that theory  
4 is often developed and expressed in the form of mathematical models that can feel  
5 daunting and inaccessible for students and empiricists with variable quantitative  
6 training and attitudes towards math.
- 7 2. A promising way to make mathematical models more approachable is to embed  
8 them into interactive tools with which one can visually evaluate model structures  
9 and directly explore model outcomes through simulation.
- 10 3. To promote such interactive learning of quantitative models, we developed  
11 EcoEvoApps, a collection of free, open-source (R/Shiny) apps that include model  
12 overviews, interactive model simulations, and code to implement these models  
13 directly in R. The package currently focuses on canonical models of population  
14 dynamics, species interaction, and landscape ecology. We also outline a vision and  
15 approach for growing the collection to include more models from across EEB.
- 16 4. These apps help illustrate fundamental results from theoretical ecology and can  
17 serve as valuable teaching tools in classroom settings. We present data from  
18 student surveys which show that students rate these apps as useful learning tools,  
19 and that using interactive apps leads to substantial gains in students' interest and  
20 confidence in mathematical models. This points to the potential for interactive  
21 activities to make theoretical models more accessible to a wider audience, and thus  
22 facilitate the feedback between theory and data across ecology and evolutionary  
23 biology.

24 **Keywords:** mathematical modeling, R package, shiny apps, ecological theory, teaching

## 25 Introduction

26 Integrating theory with insights from observations and experiments is a fundamental  
27 driver of progress across the life sciences (Jungck 1997, Shou et al. 2015), including in  
28 ecology and evolutionary biology (EEB) (Marquet et al. 2014, Servedio et al. 2014). While  
29 not all theory is mathematical, research that synthesizes data with mathematical models  
30 can enable generalization across systems, promote a deeper conceptual understanding  
31 of biological systems by clarifying the role and consequences of different biological  
32 factors, help disentangle complex interactions and feedbacks, and highlight important  
33 areas for further study (Haldane 1964, Caswell 1988). Such integration can also have  
34 important applications in biological forecasts and in informing actions and policies at  
35 the interface of science and society (Conway 1977, Wainwright et al. 2018). Despite  
36 widespread agreement between empiricists and theoreticians that more synergism  
37 between these two approaches towards EEB research can yield fruitful insights (Jeltsch  
38 et al. 2013, Scheiner 2013, Haller 2014, Shou et al. 2015), there are numerous barriers that  
39 limit such integration.

40 One such barrier towards more integration is that the language of mathematical  
41 models and their analytical solutions may seem foreign to those who come to EEB from  
42 a more empirical background. As a result, equation-heavy papers tend to be cited less  
43 often (Fawcett and Higginson 2012), and instructors of quantitative courses tend to  
44 receive worse student evaluations than those who de-emphasize quantitative topics  
45 (Uttl et al. 2013, Kreitzer and Sweet-Cushman 2021). However, while many authors have  
46 called for an increased emphasis on quantitative training at all stages in EEB education,  
47 these calls focus primarily on an increased emphasis on statistical models (e.g. Ellison  
48 and Dennis 2010) or on programming/computational skills (e.g. Losos et al. 2013, Feng  
49 et al. 2020), with relatively few advances in the pedagogy of theoretical models (but see  
50 Lehman et al. 2020, Grainger et al. 2022). Across quantitative biology more broadly, a

51 growing body of research suggests that interactive tools that allow users to  
52 independently explore model structure and outcomes help increase student interest and  
53 understanding of quantitative concepts (e.g. Thompson et al. 2010, Feser et al. 2013, Ou  
54 et al. 2022). Establishing a platform for interactive simulations of EEB models thus has  
55 the potential to facilitate communication and collaboration between theoretical and  
56 empirical researchers.

57 Here we describe EcoEvoApps, an open-source R package (ecoevoapps) and  
58 website (<https://ecoevoapps.gitlab.io>) that provides a collection of freely available  
59 interactive apps that simulate fundamental EEB models. The package also includes  
60 functions to directly run models through the R console, and can thus serve as a bridge to  
61 help users become familiar with coding and implementing theoretical models. We  
62 illustrate how these apps can be used to help communicate and learn insights from  
63 theoretical models, both at the level of an individual seeking to gain more familiarity  
64 with a model, and in large undergraduate classroom settings. We actively invite anyone  
65 who wishes to contribute to the project by writing new apps, reviewing and/or adding  
66 new features to existing apps, translating apps into other languages, or contributing  
67 teaching plans, to join our community.

## 68 **Package overview**

### 69 **Interactive (Shiny) apps**

70 At the heart of ecoevoapps are 11 interactive apps (Table 1), which we expect to be the  
71 primary avenue through which most users interact with the package. We chose the  
72 models to include in this first release of ecoevoapps by surveying syllabi for  
73 undergraduate ecology courses and commonly-used textbooks (Gotelli 2008, Begon and  
74 Townsend 2020). We expect to build on this collection with future releases of the

75 package. Some apps implement the dynamics of one specific model (e.g. the abiotic  
76 resource competition app, which models two species competing for two essential  
77 resources (Tilman 1980)), while other apps present several closely related models. For  
78 example, the predator-prey dynamics app includes a tab that presents the classic  
79 Lotka-Volterra model, and other tabs with model extensions that integrate logistic  
80 growth in the prey and/or a type II functional response for the predator (Fig. 1). Each  
81 app includes a brief description of the model structure and history, a table with  
82 parameter definitions, and references to relevant literature. A core set of nine apps are  
83 available in English, Spanish, and Chinese, Turkish, and Portuguese (Table 1). We plan to  
84 continue adding new apps and translating existing apps both internally and by soliciting  
85 contributions from community members (see “Contributing to EcoEvoApps” below).

86 The shiny apps are freely available online on RStudio’s shinyapps.io servers (links  
87 available in Table 1), or can be launched locally from users’ personal computers from the  
88 R console. For such deployment, the package provides a series of functions with the  
89 prefix `shiny_` that launch the apps. The package also includes a vignette with  
90 instructions for users who wish to customize and deploy their own instance of an app,  
91 e.g. for hosting on institutional servers or to modify an app’s content for a specific  
92 classroom lesson. Finally, the package also includes model-specific vignettes with  
93 instructions for simulating the model dynamics directly through R  
94 (e.g. `vignette("predator-prey-interactions")`).

## 95 **Functions for simulating and visualizing model dynamics**

96 Under the hood, the shiny apps use functions in the `ecoevoapps` package to simulate and  
97 visualize model dynamics (Table 1). Simulations are conducted by functions with the  
98 prefix `run_`, which take as their input the parameter values and other relevant  
99 information for the particular model. For example, `run_predprey_model()` requires as

100 inputs a vector defining the parameter values (`params`), a vector of the initial population  
101 sizes for the predator and prey species (`init`), and the time steps over which to run the  
102 model (`time`). The function returns a dataframe of the population sizes for each species  
103 over the specified time series. The package also includes a series of plotting functions  
104 prefixed `plot_`, which take as their input the object returned by the corresponding `run_`  
105 function, and in turn return a `ggplot2` object. Using `ecoevoapps` functions, the outputs  
106 in Fig. 1 can be generated with the following code:

```
# remotes::install_gitlab("ecoevoapps/ecoevoapps")  
library(ecoevoapps)  
  
# define parameter vector, initial state, and time  
params_vec <- c(r = 0.5, a = 0.1, e = 0.2, d = 0.3)  
init_vec <- c(H = 10, P = 10)  
timesteps <- 100  
  
# Run model dynamics  
lvpp_out <- run_predprey_model(params = params_vec, init = init_vec,  
                               time = timesteps)  
  
# Plot trajectory through time  
plot_predprey_time(lvpp_out)  
  
# Plot the phase portrait  
plot_predprey_portrait(lvpp_out, params_vec, vectors_field = T)
```

107 The complete list of functions for simulating and plotting model dynamics is  
108 provided in Table 1. Each function's usage is documented in the package, and suites of  
109 functions relevant to different models are described in the corresponding vignettes.  
110 While we expect the interactive apps to be the primary mode for most user's  
111 engagement with the package, users familiar with R — or those who wish to build this  
112 familiarity — can use these functions to conduct visualizations or analyses beyond those  
113 presented in the apps. Thus, the package can also serve as a gateway for users to  
114 implement and manipulate mathematical models at the command line.

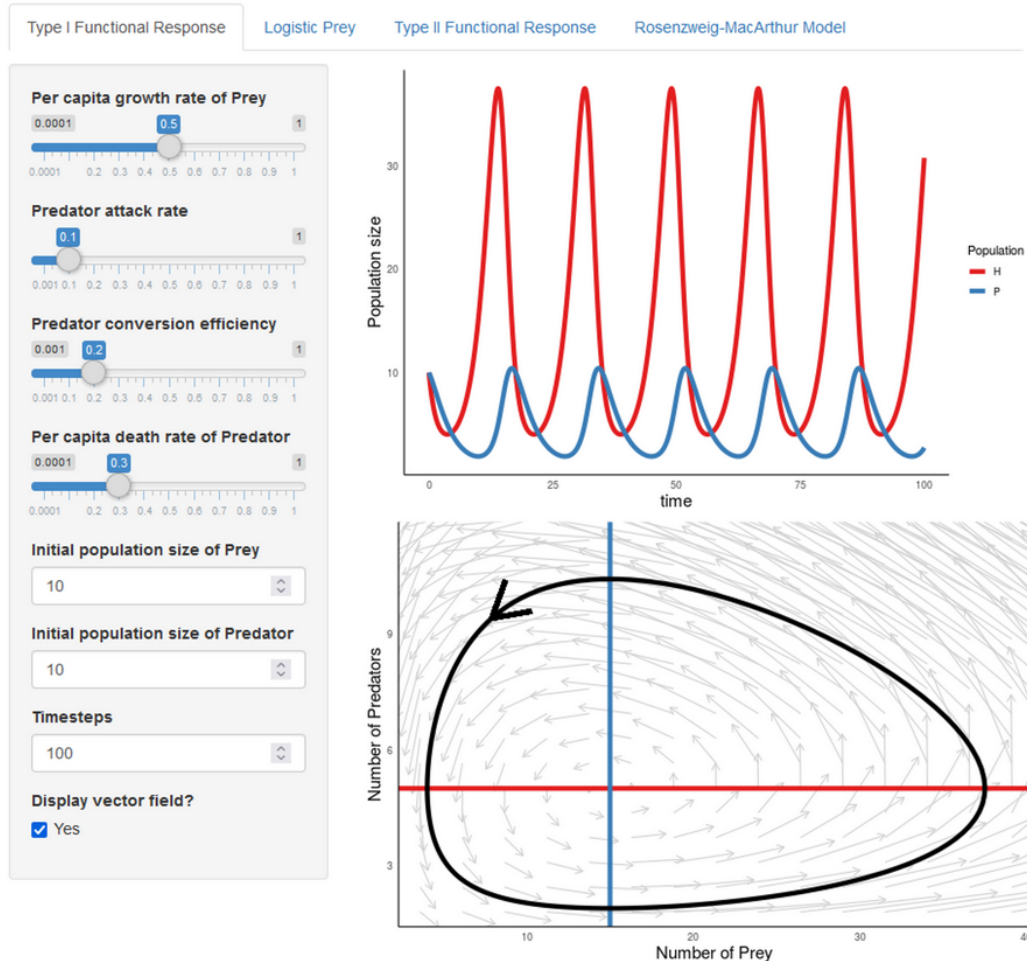

Figure 1: Screenshot of the predator-prey dynamics shiny app being used to simulate Lotka-Volterra dynamics. Users set parameter values on the left-hand panel, and these inputs are used to generate the population trajectory and phase portrait on the right. In addition to this interactive component, the shiny app also includes a verbal description of the model, the model equations, and a parameter table. The app also includes three other tabs that incorporate logistic growth in the prey, type II functional response for the predator, or both. The app is available online at [https://ecoevoapps.shinyapps.io/predator-prey\\_dynamics/](https://ecoevoapps.shinyapps.io/predator-prey_dynamics/), or can be deployed from the R command line with `shiny_predprey()`.

## 115 **Installation and dependencies**

116 The ecoevoapps package can be installed from GitLab:  
117 `remotes::install_gitlab("ecoevoapps/ecoevoapps")`. The package depends on  
118 functions from `deSolve` (Soetaert et al. 2010), `diagram` (Soetaert 2020), `patchwork`  
119 (Pedersen 2020), and various packages within the tidyverse (Wickham et al. 2019). We  
120 have tested the ecoevoapps package on R versions >4, and have tested the shiny apps on  
121 Firefox, Chrome, and Safari.

## 122 **Contributing to EcoEvoApps**

123 This manuscript describes the first release of EcoEvoApps, and we envision this package  
124 to grow as a collaborative and inclusive effort. In particular, our overarching goal is to  
125 leverage the diverse expertise of the EEB community to build an open educational  
126 resource that facilitates dialogue between theoretical and empirical research. As such,  
127 EcoEvoApps offers several mechanisms by which educators, researchers, and students  
128 can contribute to the project. These mechanisms include (1) writing and contributing  
129 new apps, (2) revising existing apps, (3) providing feedback, translating apps, or  
130 requesting new apps or features, and (4) contributing classroom activities or other  
131 use-cases involving the use of one or more of the apps. Detailed contribution guidelines  
132 are provided as a vignette (`vignette("contributing")`). Contributors are  
133 acknowledged in the package source code, as well as on the project homepage  
134 (<https://ecoevoapps.gitlab.io/people/>).



## 135 Use cases

### 136 Communicating and learning insights from classic models

137 Theoreticians and empiricists alike can use shiny apps to help communicate and learn  
138 insights from mathematical models. For example, the paradox of enrichment  
139 (Rosenzweig 1971) can be visualized with the predator-prey model app by altering the  
140 value of the prey carrying capacity ( $K$ ) in the *MacArthur-Rosenzweig model* tab. Low  
141 values of prey carrying capacity result in a stationary equilibrium or one with stable  
142 oscillations, while high values of prey carrying capacity — as might occur when a  
143 system is “enriched” — result in unstable oscillations that ultimately limit the system’s  
144 persistence. In particular, careful exploration of the parameter  $K$  can reveal the logic  
145 behind Rosenzweig (1971)’s conclusion that the system can persist with stable  
146 oscillations or a stationary equilibrium only when the equilibrium point (intersection of  
147 the two isoclines) occurs to the right of the hump in the prey isocline (Fig. 2).

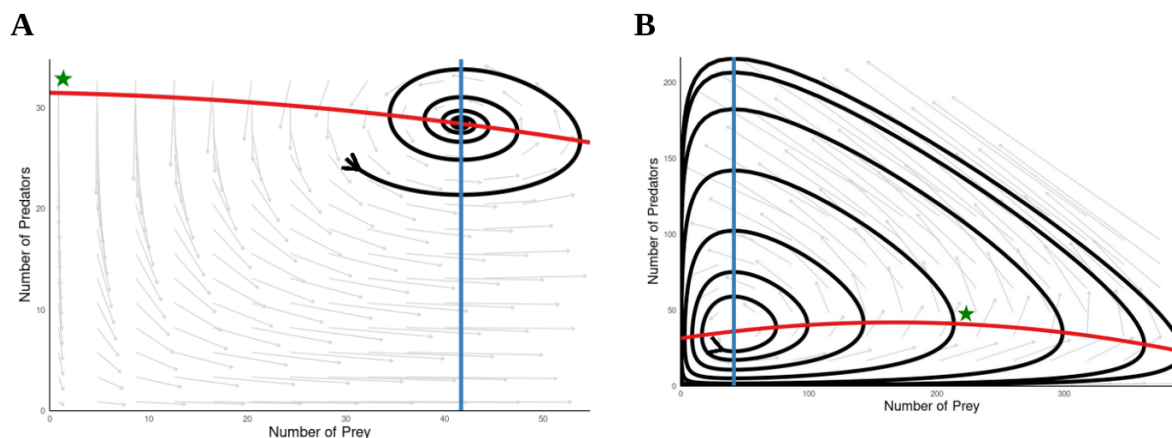

Figure 2: Screenshots of the predator-prey dynamics shiny app being used to simulate the MacArthur-Rosenzweig model. Panel A shows dampened oscillations arising at low prey carrying capacities ( $K = 200$ ) when the predator (blue) isocline intersects the prey (red) isocline to the right of the “hump” (indicated by the green star, which was added onto the screenshot). In contrast, panel B shows the unstable oscillations that arise under high prey carrying capacity ( $K = 500$ ) when predator isocline intersects the prey isocline to the left of the hump (green star).

## 148 **Classroom teaching**

149 ecoevoapps can also be used as a formal instruction tool for teaching mathematical  
150 models. To evaluate the value of these apps in classroom settings, we surveyed 51  
151 students who used the shiny apps for Island Biogeography and Lotka-Volterra  
152 competition to learn these topics in an upper-division Ecology course at the University  
153 of California, Los Angeles (UCLA, see supplements S1-S5 for details). The learning  
154 activity included short (~15 minutes) video lectures that presented an overview of the  
155 model and the shiny app, followed by a worksheet that navigated students through a  
156 guided exploration of the model (worksheet available in Supplement S3). After  
157 completing the activity, students rated on a scale of 1-7 the degree to which the apps  
158 helped them understand the model as a whole, as well as specific topics associated with  
159 the model. An overwhelming majority of students (40/51) reported that the apps were  
160 moderately to very helpful for learning the models as whole (response of 6 or 7, Fig. 3A).  
161 The apps also appear to help students better understand specific ideas related to the  
162 models (e.g. students report that they better understand the concepts of “carrying  
163 capacity” or “coexistence” after using the Lotka-Volterra competition app, Fig. 3B). We  
164 also conducted similar surveys of students in a General Ecology course at the University  
165 of Missouri (MU), with similar results (Supplement S2). In particular, by tracking  
166 individual students’ interest and confidence in models before and after the activity, we  
167 found that using interactive apps led to substantial gains in student confidence,  
168 especially among students who express higher interest in related topics (Fig. S2.1).  
169 Classroom surveys were reviewed by the UCLA Institutional Review Board and MU  
170 Institutional Review Board were determined to constitute “exempt” studies (UCLA IRB  
171 #20-002179; MU IRB Project #2031063, Review #276104).

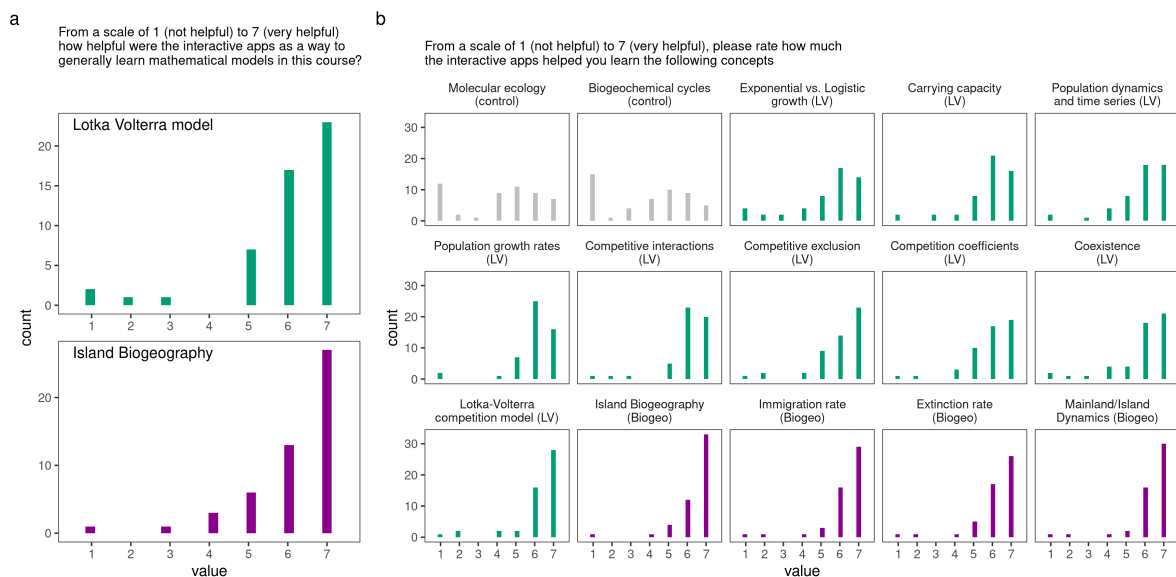

Figure 3: Students at UCLA ( $n = 51$ ) generally rated the Lotka-Volterra competition and Island Biogeography apps to be valuable tools to help learn the models overall (a), as well as for specific topics within each model (b). Green histograms indicate topics related to the Lotka-Volterra competition model, purple histograms indicate topics related to Island Biogeography, and grey histograms indicate topics unrelated to either activity, which served as a control.

## Conclusions and outlook

Integrating theoretical and empirical approaches is often heralded as an ideal path for progress in ecology and evolutionary biology (Jeltsch et al. 2013, Shou et al. 2015, Laubmeier et al. 2020, Servedio 2020), but such integration remains relatively limited (Scheiner 2013). One likely barrier is that students are often not exposed to extensive quantitative training in traditional biology curricula (Chiel et al. 2010), and as a result, theoretical models remain intimidating for many empirical researchers (Haller 2014, Grainger et al. 2022). While simulation-based learning may not provide all the same insights as analytical solutions, platforms like R and shiny allow us to build tools that give everyone easier access to theoretical insights can otherwise take years of quantitative training to grasp. We leveraged these advances to build EcoEvoApps, a collection of web apps that allow users to interactively explore theoretical models,

184 adding to a variety of existing interactive EEB education web resources (e.g. Evo-Ed  
185 (<http://www.evo-ed.org>), HHMI BioInteractive (<https://www.biointeractive.org>),  
186 Populus (Alstad 2001)). A key distinguishing feature is that unlike these other resources,  
187 ecoevoapps is entirely open-source and written in R. As such, it is easily accessible and  
188 customizable by others in the EEB community, where R is among the most commonly  
189 used programming languages (Gentleman et al. 2004, Lai et al. 2019). Moving forward,  
190 we will prioritize incorporating mathematical models from evolutionary biology and  
191 population genetics into the package to complement the current ecological focus.  
192 Building on our preliminary evidence that shiny apps are useful tools for teaching  
193 quantitative models in classroom settings, we also plan to develop and evaluate new  
194 lesson plans for EEB educators teaching mathematical models.

## 195 **Acknowledgments**

196 We acknowledge the Gabrielino/Tongva peoples as the traditional land caretakers of  
197 Tovaangar (the Los Angeles Basin and Southern Channel Islands), where the University  
198 of California, Los Angeles (UCLA) is located. We also respectfully acknowledge that the  
199 University of Missouri is located on the traditional, ancestral lands of the Osage, Omaha,  
200 and Kaw peoples, among others. We thank Gary Bucciarelli for helping conduct surveys  
201 at UCLA, and Mayda Nathan, Chris Muir, and Daniel Gruner for contributing apps to  
202 the EcoEvoApps website. We thank Caroline Farrior for comments on the manuscript.  
203 This material is based upon work supported by the National Science Foundation  
204 Graduate Research Fellowship Program to RMM under Grant No. (DGE-2034835). RMM  
205 was also supported by the Eugene V. Cota-Robles Fellowship. MCV was supported by a  
206 CAPES doctoral fellowship (2014, BEX:10079-13-0). MCC was supported by an NIH  
207 Systems in Integrative Biology Training Grant. Any opinions, findings, and conclusions  
208 or recommendations expressed in this material are those of the author(s) and do not  
209 necessarily reflect the views of the National Science Foundation or the NIH.

## References

- 210
- 211 Alstad, D. 2001. *Basic Populations Models of Ecology*. Prentice Hall.
- 212 Begon, M., and C. R. Townsend. 2020. *Ecology: From individuals to ecosystems*. John  
213 Wiley & Sons.
- 214 Caswell, H. 1988. Theory and models in ecology: A different perspective. *Ecological*  
215 *modelling* 43:33–44.
- 216 Chiel, H. J., J. M. McManus, and K. M. Shaw. 2010. From biology to mathematical  
217 models and back: Teaching modeling to biology students, and biology to math and  
218 engineering students. *CBE—Life Sciences Education* 9:248–265.
- 219 Conway, G. R. 1977. Mathematical models in applied ecology. *Nature* 269:291–297.
- 220 Ellison, A. M., and B. Dennis. 2010. Paths to statistical fluency for ecologists. *Frontiers in*  
221 *Ecology and the Environment* 8:362–370.
- 222 Fawcett, T. W., and A. D. Higginson. 2012. Heavy use of equations impedes  
223 communication among biologists. *Proceedings of the National Academy of Sciences*  
224 109:11735–11739.
- 225 Feng, X., H. Qiao, and B. J. Enquist. 2020. Doubling demands in programming skills call  
226 for ecoinformatics education. *Frontiers in Ecology and the Environment* 18:123–124.
- 227 Feser, J., H. Vasaly, and J. Herrera. 2013. On the edge of mathematics and biology  
228 integration: Improving quantitative skills in undergraduate biology education.  
229 *CBE—Life Sciences Education* 12:124–128.
- 230 Gentleman, R. C., V. J. Carey, D. M. Bates, B. Bolstad, M. Dettling, S. Dudoit, B. Ellis, L.  
231 Gautier, Y. Ge, J. Gentry, and others. 2004. Bioconductor: Open software  
232 development for computational biology and bioinformatics. *Genome biology* 5:1–16.
- 233 Gotelli, N. J. 2008. *A Primer of Ecology*. Fourth edition. Sinauer Associates, Sunderland,  
234 MA.
- 235 Grainger, T. N., A. Senthilnathan, P.-J. Ke, M. A. Barbour, N. T. Jones, J. P. DeLong, S. P.  
236 Otto, M. I. O’connor, K. E. Coblentz, N. Goel, and others. 2022. An empiricist’s guide  
237 to using ecological theory. *The American Naturalist* 199:1–20.
- 238 Haldane, J. B. S. 1964. A defense of beanbag genetics. *Perspectives in Biology and*  
239 *Medicine* 7:343–360.
- 240 Haller, B. C. 2014. Theoretical and empirical perspectives in ecology and evolution: A  
241 survey. *BioScience* 64:907–916.
- 242 Jeltsch, F., N. Blaum, U. Brose, J. D. Chipperfield, Y. Clough, N. Farwig, K. Geissler, C. H.  
243 Graham, V. Grimm, T. Hickler, and others. 2013. How can we bring together  
244 empiricists and modellers in functional biodiversity research? *Basic and Applied*  
245 *Ecology* 14:93–101.
- 246 Jungck, J. R. 1997. Ten equations that changed biology: Mathematics in problem-solving

- 247 biology curricula. *Bioscience* 23:11–36.
- 248 Kreitzer, R. J., and J. Sweet-Cushman. 2021. Evaluating student evaluations of teaching:  
249 A review of measurement and equity bias in SETs and recommendations for ethical  
250 reform. *Journal of Academic Ethics*:1–12.
- 251 Lai, J., C. J. Lortie, R. A. Muenchen, J. Yang, and K. Ma. 2019. Evaluating the popularity  
252 of R in ecology. *Ecosphere* 10:e02567.
- 253 Laubmeier, A. N., B. Cazelles, K. Cuddington, K. D. Erickson, M.-J. Fortin, K. Ogle, C. K.  
254 Wikle, K. Zhu, and E. F. Zipkin. 2020. Ecological dynamics: Integrating empirical,  
255 statistical, and analytical methods. *Trends in Ecology & Evolution* 35:1090–1099.
- 256 Lehman, C., S. Loberg, A. T. Clark, and D. Schmitter. 2020. Unifying the basic models of  
257 ecology to be more complete and easier to teach. *BioScience* 70:415–426.
- 258 Losos, J. B., S. J. Arnold, G. Bejerano, E. D. B. Iii, D. Hibbett, H. E. Hoekstra, D. P.  
259 Mindell, A. Monteiro, C. Moritz, H. A. Orr, D. A. Petrov, S. S. Renner, R. E. Ricklefs, P.  
260 S. Soltis, and T. L. Turner. 2013. Evolutionary biology for the 21st century. *PLOS*  
261 *Biology* 11:e1001466.
- 262 Marquet, P. A., A. P. Allen, J. H. Brown, J. A. Dunne, B. J. Enquist, J. F. Gillooly, P. A.  
263 Gowaty, J. L. Green, J. Harte, S. P. Hubbell, J. O'Dwyer, J. G. Okie, A. Ostling, M.  
264 Ritchie, D. Storch, and G. B. West. 2014. On theory in ecology. *BioScience* 64:701–710.
- 265 Ou, W. J., G. J. Henriques, A. Senthilnathan, P.-J. Ke, T. N. Grainger, and R. M. Germain.  
266 2022. Writing accessible theory in ecology and evolution: Insights from cognitive  
267 load theory. *BioScience*.
- 268 Pedersen, T. L. 2020. Patchwork: The composer of plots.
- 269 Rosenzweig, M. L. 1971. Paradox of enrichment: Destabilization of exploitation  
270 ecosystems in ecological time. *Science* 171:385–387.
- 271 Scheiner, S. M. 2013. The ecological literature, an idea-free distribution. *Ecology Letters*  
272 16:1421–1423.
- 273 Servedio, M. R. 2020. An effective mutualism? The role of theoretical studies in ecology  
274 and evolution. *The American Naturalist* 195:284–289.
- 275 Servedio, M. R., Y. Brandvain, S. Dhole, C. L. Fitzpatrick, E. E. Goldberg, C. A. Stern, J. V.  
276 Cleve, and D. J. Yeh. 2014. Not just a theory—The utility of mathematical models in  
277 evolutionary biology. *PLoS Biology* 12:e1002017.
- 278 Shou, W., C. T. Bergstrom, A. K. Chakraborty, and F. K. Skinner. 2015. Theory, models  
279 and biology. *Elife* 4:e07158.
- 280 Soetaert, K. 2020. Diagram: Functions for visualising simple graphs (networks), plotting  
281 flow diagrams.
- 282 Soetaert, K., T. Petzoldt, and R. W. Setzer. 2010. Solving differential equations in R:  
283 Package deSolve. *Journal of Statistical Software* 33:1–25.

- 284 Thompson, K. V., K. C. Nelson, G. Marbach-Ad, M. Keller, and W. F. Fagan. 2010. Online  
285 interactive teaching modules enhance quantitative proficiency of introductory  
286 biology students. *CBE—Life Sciences Education* 9:277–283.
- 287 Tilman, D. 1980. Resources: A graphical-mechanistic approach to competition and  
288 predation. *The American Naturalist* 116:362–393.
- 289 Uttl, B., C. A. White, and A. Morin. 2013. The numbers tell it all: Students don't like  
290 numbers! *PloS one* 8:e83443.
- 291 Wainwright, C. E., T. L. Staples, L. S. Charles, T. C. Flanagan, H. R. Lai, X. Loy, V. A.  
292 Reynolds, and M. M. Mayfield. 2018. Links between community ecology theory and  
293 ecological restoration are on the rise. *Journal of Applied Ecology* 55:570–581.
- 294 Wickham, H., M. Averick, J. Bryan, W. Chang, L. D. McGowan, R. François, G.  
295 Grolemond, A. Hayes, L. Henry, J. Hester, M. Kuhn, T. L. Pedersen, E. Miller, S. M.  
296 Bache, K. Müller, J. Ooms, D. Robinson, D. P. Seidel, V. Spinu, K. Takahashi, D.  
297 Vaughan, C. Wilke, K. Woo, and H. Yutani. 2019. Welcome to the tidyverse. *Journal*  
298 *of Open Source Software* 4:1686.



299 **Tables (*see following page*)**

300 Table 1: Models and functions included in the ecoevoapps package. In addition to the  
301 functions listed in the table, the package also includes 11 functions with the prefix  
302 shiny\_ that can be used to deploy shiny apps directly from the command line  
303 (<https://ecoevoapps.gitlab.io/docs/reference/index.html#run-shiny-apps>).

| <b>Model</b>                           | <b>Link to shiny app</b>                                                                                                                 | <b>Functions for running the models/shiny apps</b>                                                                                                         | <b>Functions for plotting model outputs</b>                                                                                               |
|----------------------------------------|------------------------------------------------------------------------------------------------------------------------------------------|------------------------------------------------------------------------------------------------------------------------------------------------------------|-------------------------------------------------------------------------------------------------------------------------------------------|
| Population dynamics in continuous time | <a href="#">中文</a> ;<br><a href="#">Español</a> ;<br><a href="#">English</a> ;<br><a href="#">português</a> ;<br><a href="#">Turkish</a> | run_exponential_model()<br>run_logistic_model()<br>shiny_singlepop_continuous()                                                                            | plot_continuous_population_growth()                                                                                                       |
| Population dynamics in discrete time   | <a href="#">中文</a> ;<br><a href="#">Español</a> ;<br><a href="#">English</a> ;<br><a href="#">português</a> ;<br><a href="#">Turkish</a> | run_discrete_exponential_model()<br>run_discrete_logistic_model()<br>run_beverton_holt_model()<br>run_ricker_model()<br>shiny_population_growth_discrete() | plot_discrete_population_growth()<br>plot_discrete_population_cobweb()                                                                    |
| Structured population growth           | <a href="#">中文</a> ;<br><a href="#">Español</a> ;<br><a href="#">English</a> ;<br><a href="#">português</a> ;<br><a href="#">Turkish</a> | run_structured_population_simulation()<br>shiny_structured_population()                                                                                    | plot_leslie_diagram()<br>plot_structured_population_size()<br>plot_structured_population_lambda()<br>plot_structured_population_agedist() |
| Lotka-Volterra competition             | <a href="#">中文</a> ;<br><a href="#">Español</a> ;<br><a href="#">English</a> ;<br><a href="#">português</a> ;<br><a href="#">Turkish</a> | run_lvcomp_model()<br>shiny_lvcomp_model()                                                                                                                 | plot_lvcomp_time()<br>plot_lvcomp_portrait()                                                                                              |
| Predator-prey dynamics                 | <a href="#">中文</a> ;<br><a href="#">Español</a> ;<br><a href="#">English</a> ;<br><a href="#">português</a> ;<br><a href="#">Turkish</a> | run_predprey_model()<br>shiny_predprey()                                                                                                                   | plot_predprey_time()<br>plot_predprey_portrait()                                                                                          |
| Competition for abiotic resources      | <a href="#">中文</a> ;<br><a href="#">Español</a> ;<br><a href="#">English</a> ;<br><a href="#">português</a> ;<br><a href="#">Turkish</a> | run_abiotic_comp_model()<br>run_abiotic_comp_rstar()<br>shiny_abiotic_comp()                                                                               | plot_abiotic_comp_time()<br>plot_abiotic_comp_portrait()                                                                                  |

|                                                   |                                                                                                                                          |                                                                                       |                                                                                              |
|---------------------------------------------------|------------------------------------------------------------------------------------------------------------------------------------------|---------------------------------------------------------------------------------------|----------------------------------------------------------------------------------------------|
| Competition for a biotic resource                 | <a href="#">中文</a> ;<br><a href="#">Español</a> ;<br><a href="#">English</a> ;<br><a href="#">português</a> ;<br><a href="#">Turkish</a> | <code>run_biotic_comp_model()</code><br><code>shiny_biotic_comp()</code>              | <code>plot_biotic_comp_time()</code><br><code>plot_functional_responses()</code>             |
| Compartment models of infectious disease dynamics | <a href="#">中文</a> ;<br><a href="#">Español</a> ;<br><a href="#">English</a> ;<br><a href="#">português</a> ;<br><a href="#">Turkish</a> | <code>run_infectiousdisease_model()</code><br><code>shiny_infectious_disease()</code> | <code>plot_infectiousdisease_time()</code><br><code>plot_infectiousdisease_portrait()</code> |
| Island biogeography                               | <a href="#">中文</a> ;<br><a href="#">Español</a> ;<br><a href="#">English</a> ;<br><a href="#">português</a> ;<br><a href="#">Turkish</a> | <code>run_ibiogeo_model()</code><br><code>shiny_ibiogeo_model()</code>                | none ( <code>run_ibiogeo_model()</code> itself returns plots)                                |
| Smith-Fretwell model                              | <a href="#">English</a>                                                                                                                  | <code>run_smithfretwell_model()</code><br><code>shiny_smith_fretwell()</code>         | <code>plot_smithfretwell_model()</code>                                                      |
| Metapopulation dynamics                           | <a href="#">English</a>                                                                                                                  | <code>run_source_sink()</code><br><code>shiny_source_sink()</code>                    | <code>plot_source_sink()</code>                                                              |

## Per capita growth rate of Prey

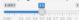

## Predator attack rate

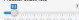

## Predator conversion efficiency

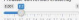

## Per capita death rate of Predator

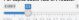

## Initial population size of Prey

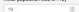

## Initial population size of Predator

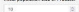

## Timestep

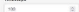

## Display vector field?

 Yes
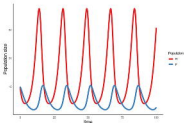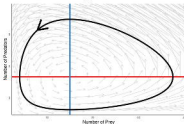

**A**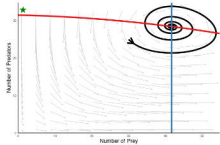**B**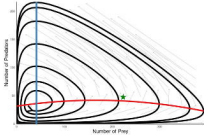

a

From a scale of 1 (not helpful) to 7 (very helpful) how helpful were the interactive apps as a way to generally learn mathematical models in this course?

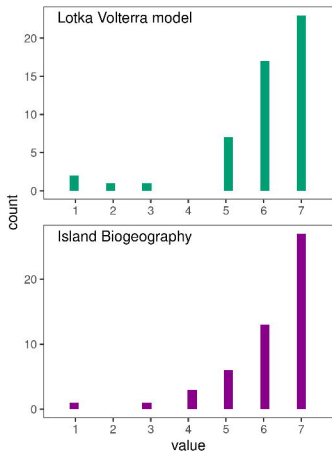

b

From a scale of 1 (not helpful) to 7 (very helpful), please rate how much the interactive apps helped you learn the following concepts

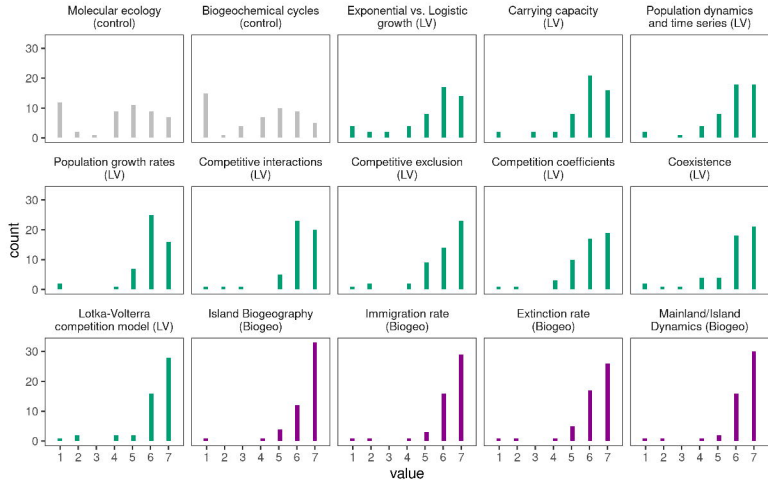

Source: https://www.biorxiv.org/content/10.1101/2021.06.18.449026v2.full.pdf
